# Supplementary material for: Genome-scale reconstruction of Gcn4/ATF4 networks driving a growth program
Source: PLoS Genet. 2020 Dec 30;16(12):e1009252. doi: 10.1371/journal.pgen.1009252 (PMC7773203; doi:10.1371/journal.pgen.1009252)
Supplement: S2 Data — (XLSX) [file pgen.1009252.s021.xlsx]

## Sheet: Anabolic and translation relate
Anabolic genes				Translation related genes
#List of Anabolic genes activated in both MM lac+Met and MMgluc+met	#List of Anabolic genes activated only in MMgluc+met	#List of Anabolic genes activated only in MM lac+Met		#List of Translation related genes activated in both MM lac+Met and MMgluc+met	#List of Translation related genes activated only in MMgluc+met	#List of Translation related genes activated only in MM lac+Met
YNR050C	YHR025W	YDR111C		YOR182C	YGL245W	YOL127W
YLR359W	YKL211C	YHR018C		YOL121C	YHR148W	YJL109C
YDR226W	YMR062C	YGL062W		YER131W	YHL004W	YDR471W
YCL030C	YER055C	YMR108W		YOR150W	YCR003W	YGL147C
YBL039C	YDR127W	YPR074C		YER056C-A	YJL069C	YGL135W
YJL130C	YFR055W	YBR252W		YLR061W	YML025C	YGR162W
YGR061C	YDR354W	YML106W		YIL052C	YBL076C	YJL191W
YOR108W	YOR323C	YPR035W		YPR102C	YPL097W	YML063W
YLR432W	YIL116W	YPR060C		YIL148W	YKR079C	YMR242C
YMR300C	YCR053W	YDL131W		YBR048W	YNL221C	YBR181C
YJL200C	YEL046C	YOR095C		YMR193W	YDR037W	YKL156W
YGL148W	YOR184W	YLR355C		YLR048W	YPL160W	YLR325C
YIR034C	YCL009C	YER070W		YBR079C	YGR094W	YHR196W
YBR249C	YDR035W	YHL011C		YOR293W	YDL133C-A	YPL079W
YJR016C	YNL104C	YOR074C		YDR418W	YOL033W	YDL136W
YDR300C	YOR202W			YDR449C	YLL018C	YJL138C
YIL094C	YNL220W			YDL130W	YDR041W	YGL103W
YJR148W	YAR015W			YPL249C-A	YPL013C	YPR033C
YOL058W	YHR033W			YGR185C	YDL184C	YNR053C
YHR208W	YER052C			YJL177W	YHR147C	YPR080W
YPR145W	YER086W			YGR148C		YHR141C
YDR234W	YDR454C			YBR084C-A		YNL162W
YBR248C	YJR130C			YGR027C		YMR309C
YOL140W	YGL234W			YOR310C		YCR057C
YGR124W	YMR120C			YGR085C		YLR293C
YDL182W	YDR408C			YGL030W		YOR361C
YGL202W	YER090W			YEL054C		YPL093W
YDR158W				YEL026W		YPL217C
YHR216W				YDR025W		YLR009W
YBR218C				YKL194C		YPL143W
YOR128C				YLR197W		YHL001W
YML056C				YGL076C		YOR234C
YLR089C				YML024W		YLR287C-A
YER081W				YDL202W		YOL139C
YGR208W				YLR406C		YKR057W
YPL111W				YER074W		YPR132W
YMR217W				YOR096W		YLR186W
				YJL136C		YAL035W
	#List of Anabolic genes activated in both MM lac+Met and MMgluc+met			YPL173W		YDR429C
	#List of Anabolic genes activated only in MMgluc+met			YIL078W		YMR230W
	#List of Anabolic genes activated only in MM lac+Met			YBR031W		YKR026C
				YLR441C		YMR194W
				YNL247W		YHR170W
				YKL180W		YPL237W
				YNL306W		YHR021C
				YDR064W		YNL096C
				YBR191W		YER050C
				YDR447C		YIL069C
				YKR059W		YNL002C
				YOR063W		YML093W
				YHL033C		YGR118W
				YGR034W		YDR398W
				YDR337W		YPL043W
				YHL015W		YGR220C
				YCR031C		YDR500C
				YNL132W
				YIL018W
				YGR214W		#List of Translation related genes activated in both MM lac+Met and MMgluc+met
				YDL208W		#List of Translation related genes activated only in MMgluc+met
				YMR260C		#List of Translation related genes activated only in MM lac+Met
				YLR388W
				YDL191W
				YOR369C
				YDR341C
				YJR145C
				YNL067W
				YOL039W
				YGL068W
				YML026C
				YLR106C
				YDR450W
				YDL014W
				YLR060W
				YNL178W
				YPL090C
				YGL123W
				YML073C
				YPR163C
				YFR032C-A
				YGL189C
				YOL010W
				YNL284C
				YBR143C
				YJR123W
				YER102W
				YHR010W
				YOR312C
				YMR142C
				YGL031C
				YJR094W-A
				YKL006W
				YLR340W
				YLR175W
				YPL198W
				YDR023W
				YJL190C
				YLR185W
				YNL302C
				YLR222C
				YLR029C
				YPL081W
				YLR333C
				YER006W
				YLR448W
				YOL097C
				YJL189W
				YDL082W
				YOL120C
				YNL301C
				YBL027W
				YLR167W
				YDL075W
				YLR129W
				YFL034C-A
				YOL040C
				YDL061C
				YBR189W
				YBL072C
				YBL092W
				YDL083C
				YER117W
				YDR324C
				YLR344W
				YLR367W
				YPL220W
				YIL133C
				YOR167C
				YDR382W
				YLR409C
				YDR237W
				YKL003C
				YHR203C
				YPL131W
				YBL087C
				YLL045C
				YHR020W
				YDL081C
				YGR264C
				YHR019C
				YGR128C
				YLR075W
				YMR188C
				YNL075W
				YNL185C
				YHR089C
				YKL205W
				YPR166C
				YFR031C-A
				YDR012W
				YNL069C
				YBR121C
				YBR146W
				YMR143W
				YDR381W
				YKR094C
