# Supplementary material for: Genome-scale reconstruction of Gcn4/ATF4 networks driving a growth program
Source: PLOS journal article supplement (doi:10.1371/journal.pgen.1009252), 2020-12-30
Supplement: S4 (10.1371/journal.pgen.1009252.s004) [file journal.pgen.1009252.s004]

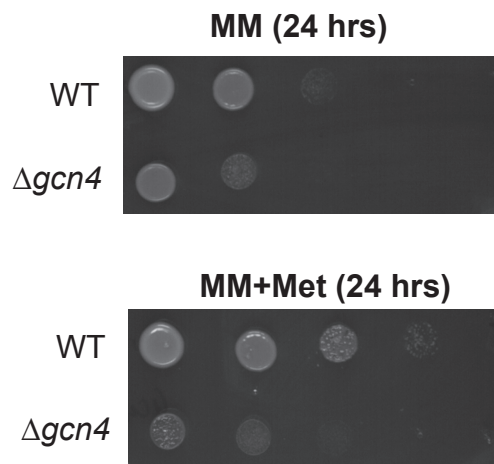

**Supplementary Figure 4: Serial dilution based growth assay, comparing WT and  $\Delta gcn4$  cells growing in the presence or absence of Methionine.**  
WT cells show better growth when supplemented with methionine. Deletion of Gcn4 lead to severely reduced growth in the presence of methionine. Also see Figure 1A.
