# Supplementary material for: Genome-scale reconstruction of Gcn4/ATF4 networks driving a growth program
Source: PLOS journal article supplement (doi:10.1371/journal.pgen.1009252), 2020-12-30

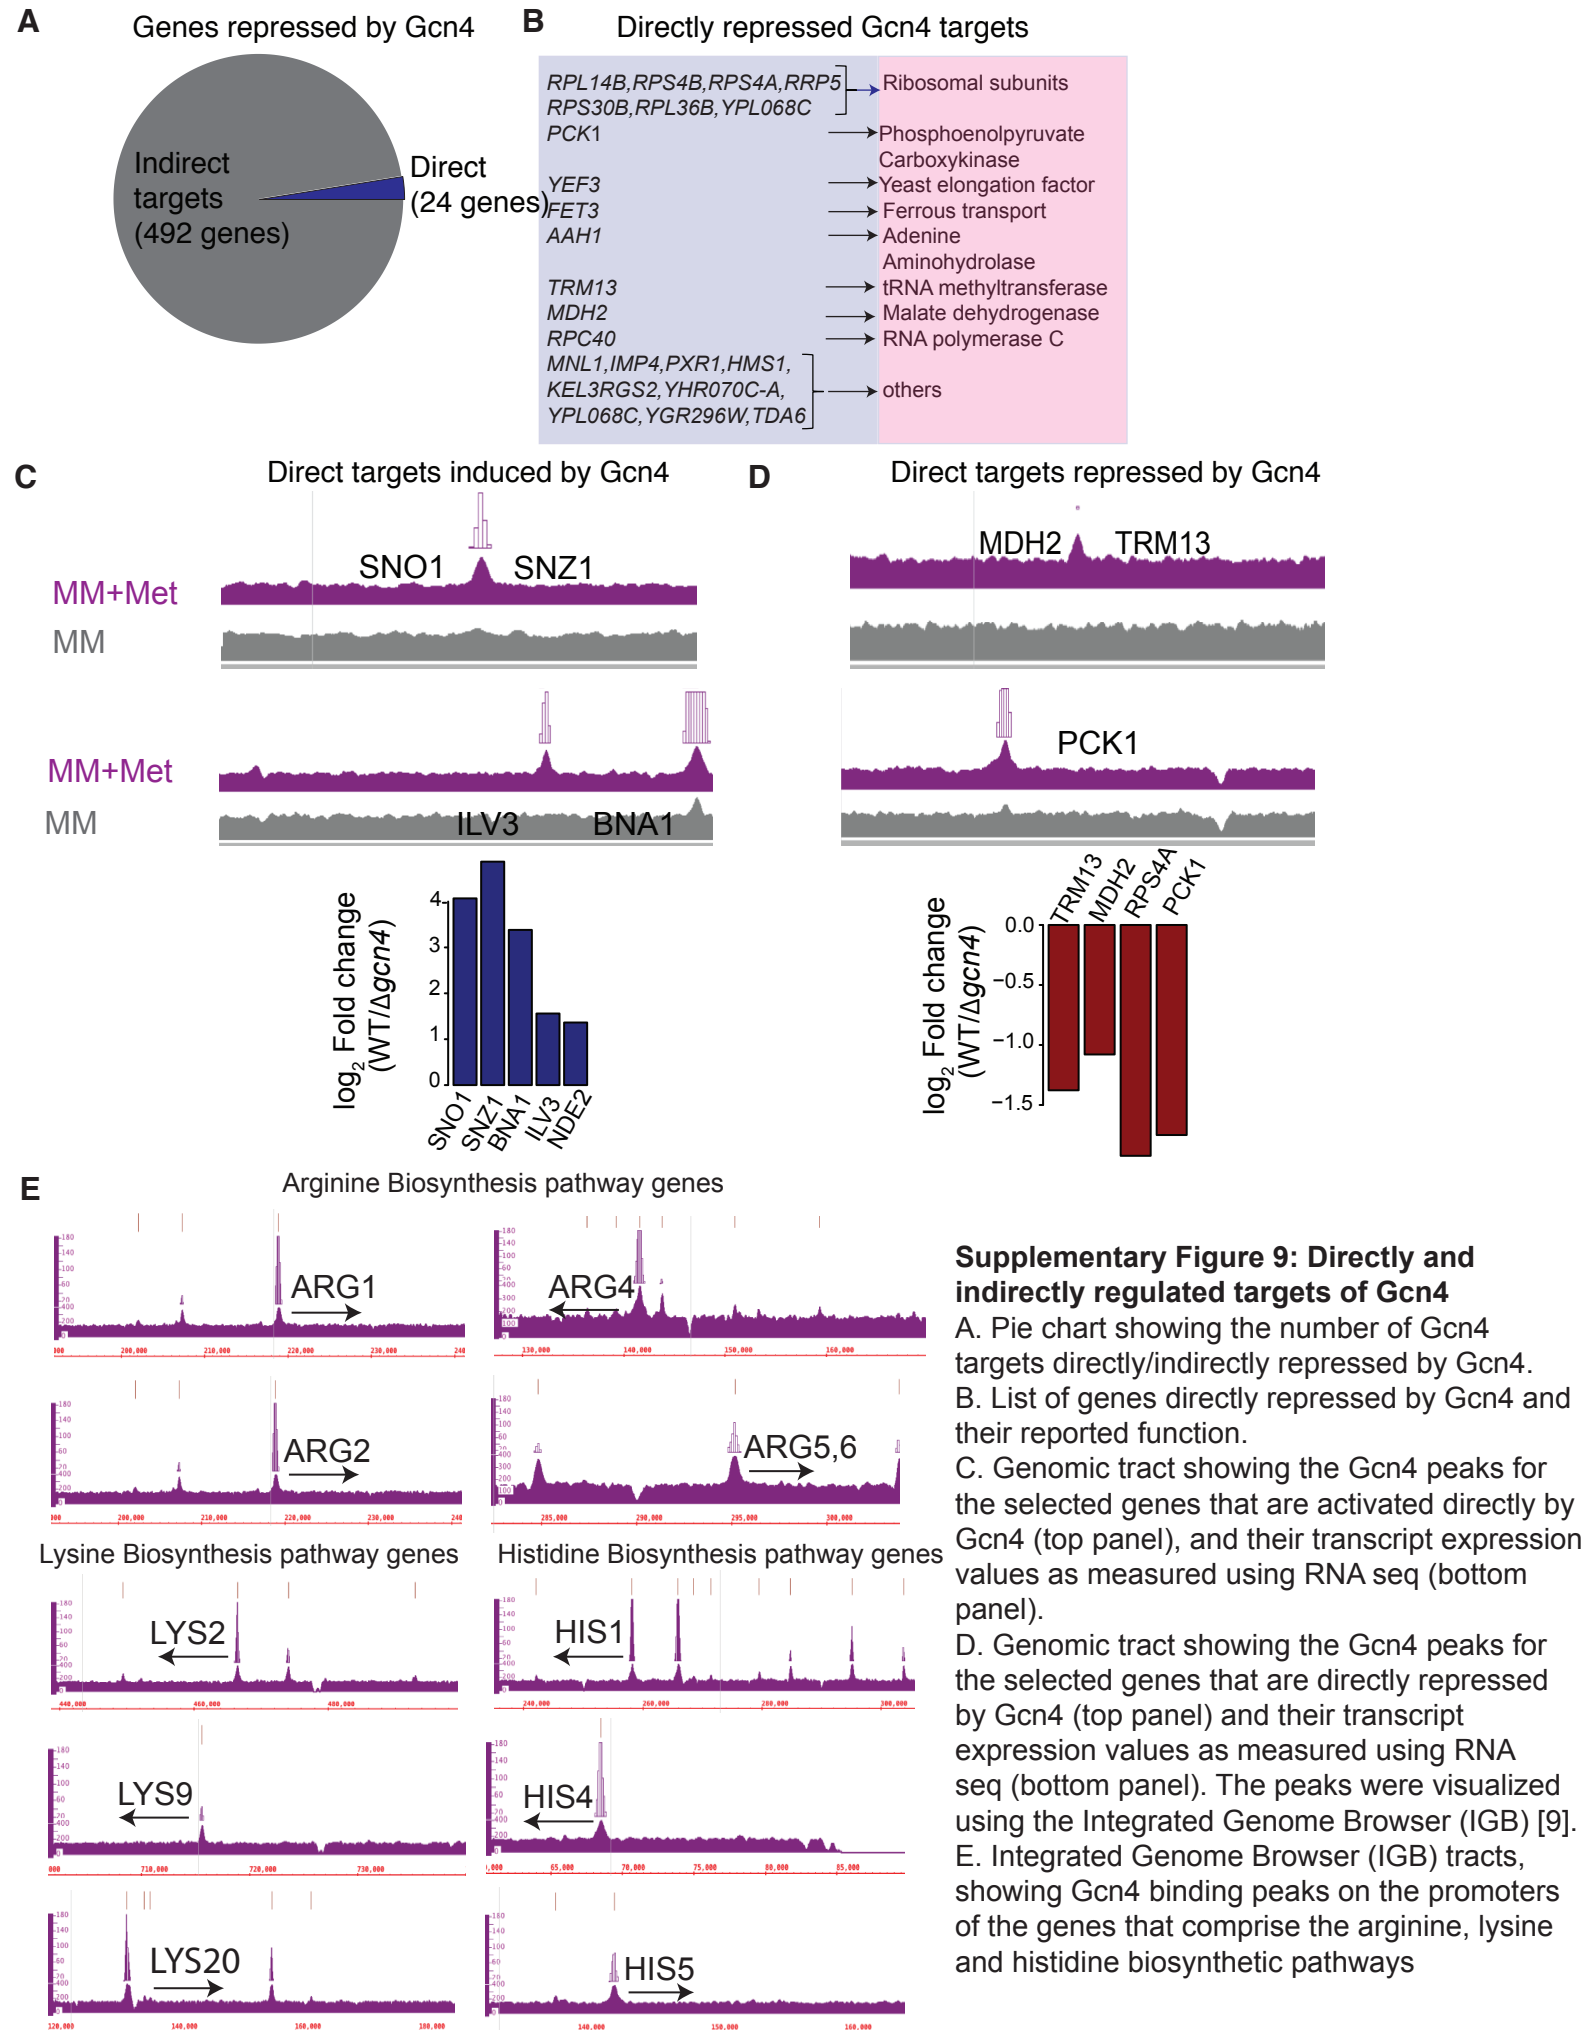

Supplement: S9 (10.1371/journal.pgen.1009252.s009) [file journal.pgen.1009252.s009]
