# Supplementary material for: Genome-scale reconstruction of Gcn4/ATF4 networks driving a growth program
Source: PLOS journal article supplement (doi:10.1371/journal.pgen.1009252), 2020-12-30
Supplement: S11 (10.1371/journal.pgen.1009252.s011) [file journal.pgen.1009252.s011]

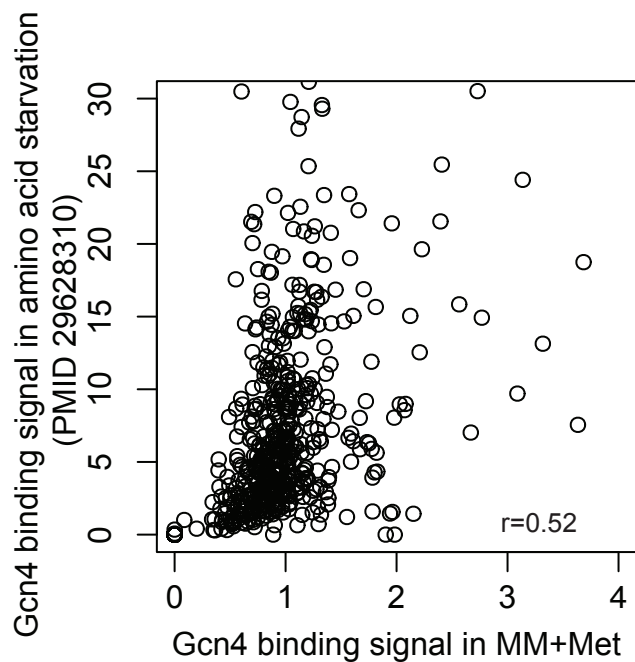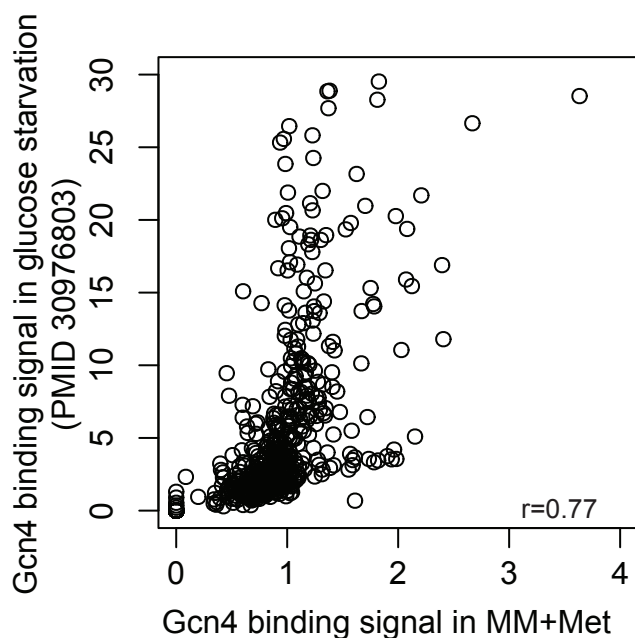

**Supplementary Figure 11: Correlation of ChIP binding signals obtained from distinct growth conditions.**

For all the Gcn4 binding peaks identified in this study (x-axis), we compared the Gcn4 binding signal from two different growth conditions (y-axis left panel – from [10], right panel – from [11]) These data suggest that irrespective of the growth medium or condition, Gcn4 binding signals correlate between distinct datasets.
